# Supplementary material
Source: PubMed Central journal article supplement (PMC3037720)
Supplement: mmc1.pdf [file mmc1.pdf]

SUPPLEMENTARY DATA FOR

**Nonadditivity in Conformational Entropy Upon Molecular Rigidification  
Reveals a Universal Mechanism Affecting Folding Cooperativity**

**Oleg K. Vorov<sup>1</sup>, Dennis R. Livesay<sup>2\*</sup>, and Donald J. Jacobs<sup>1\*</sup>**

From Department of Physics and Optical Science<sup>1</sup> and Department of Bioinformatics and Genomics<sup>2</sup>, University of North Carolina at Charlotte, Charlotte, NC 28262

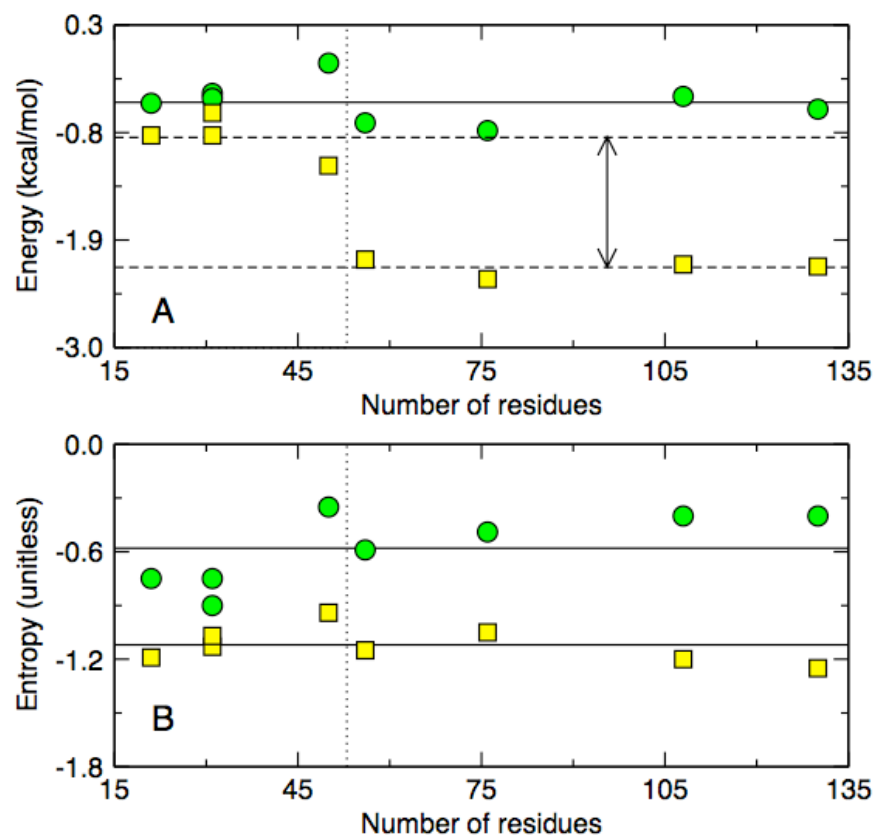

Supp. Fig. S1. Model parameters are physically realistic. Energy parameters are plotted in (a), and entropy parameters plotted in (b). Squares indicate H-bond parameters and circles indicate torsion parameters. Values to the left of the vertical dashed line are from our previously published results on polypeptides (26). The straight horizontal lines are average values that guide the eye. The variability within  $\epsilon_{hb}$ , indicated by the vertical arrow, is consistent with expected differences from solvent H-bonding. In this case, the average over the four polypeptides is significantly greater than the average the four considered protein structures.
